# Supplementary material
Source: bioRxiv or medRxiv preprint supplement (https://www.biorxiv.org/highwire/filestream/130472/field_highwire_adjunct_files/8/430314-2.pdf)

*Microvelia longipes*

① Male calling

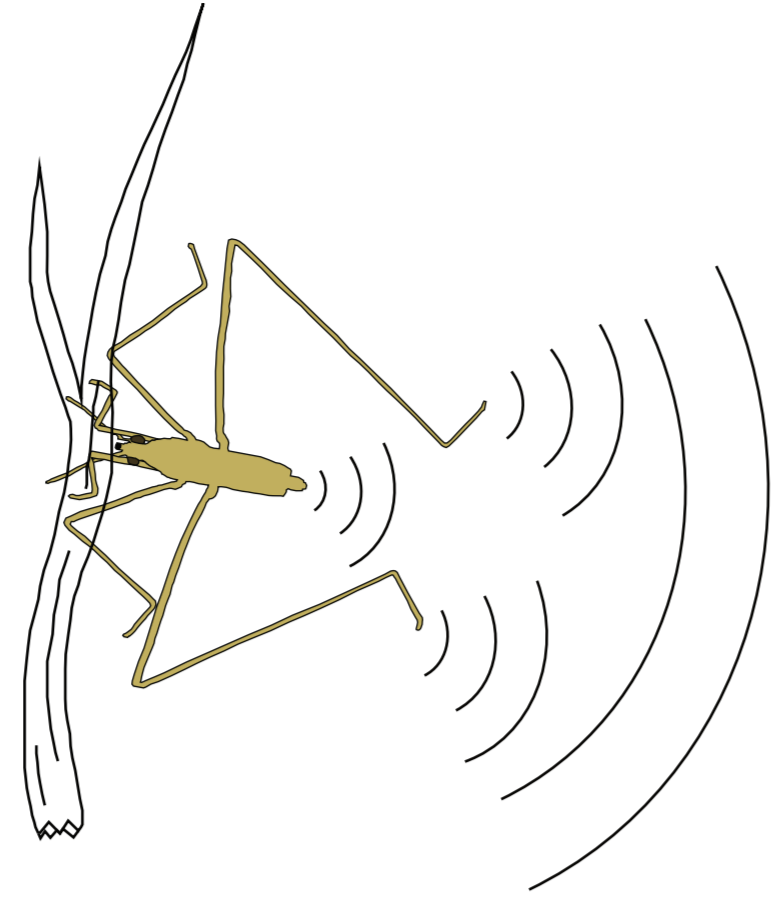

② Male fighting on floater

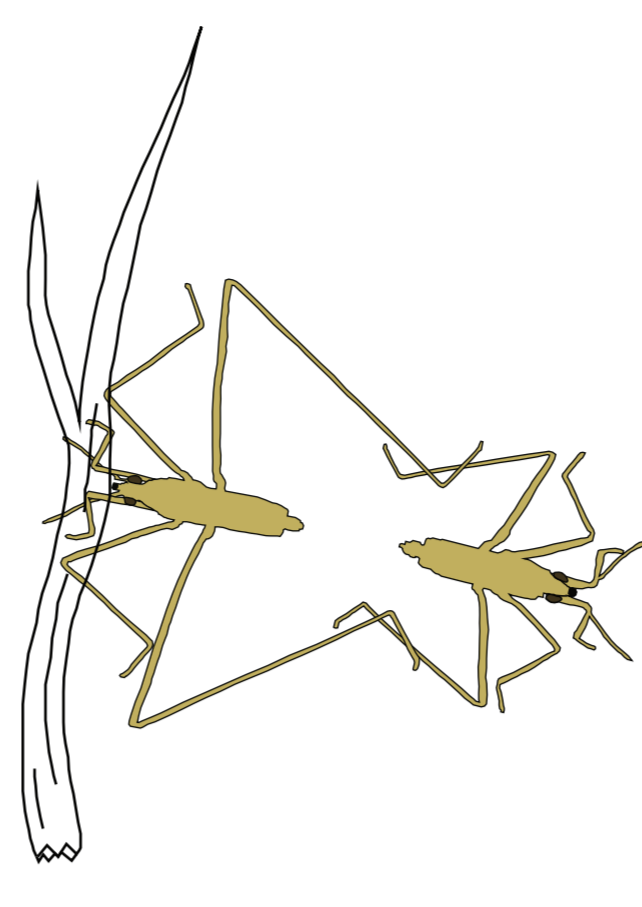

③ Mating on floater

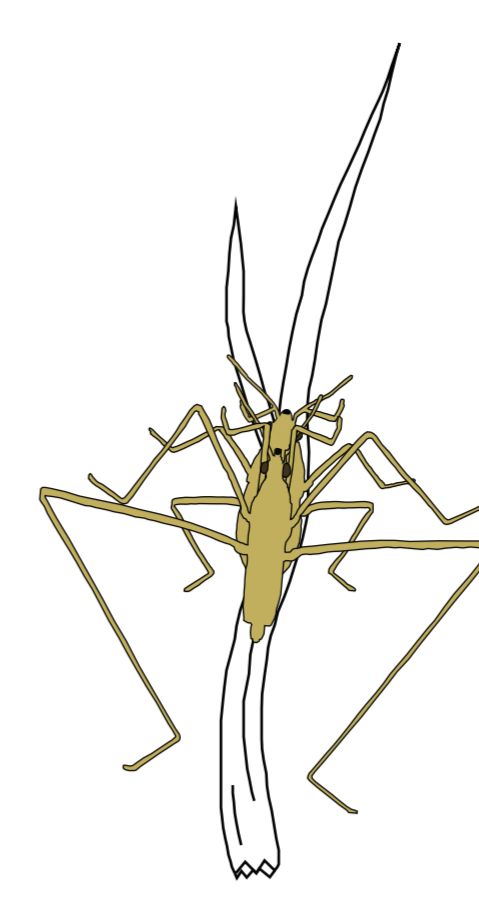

④ Male guarding

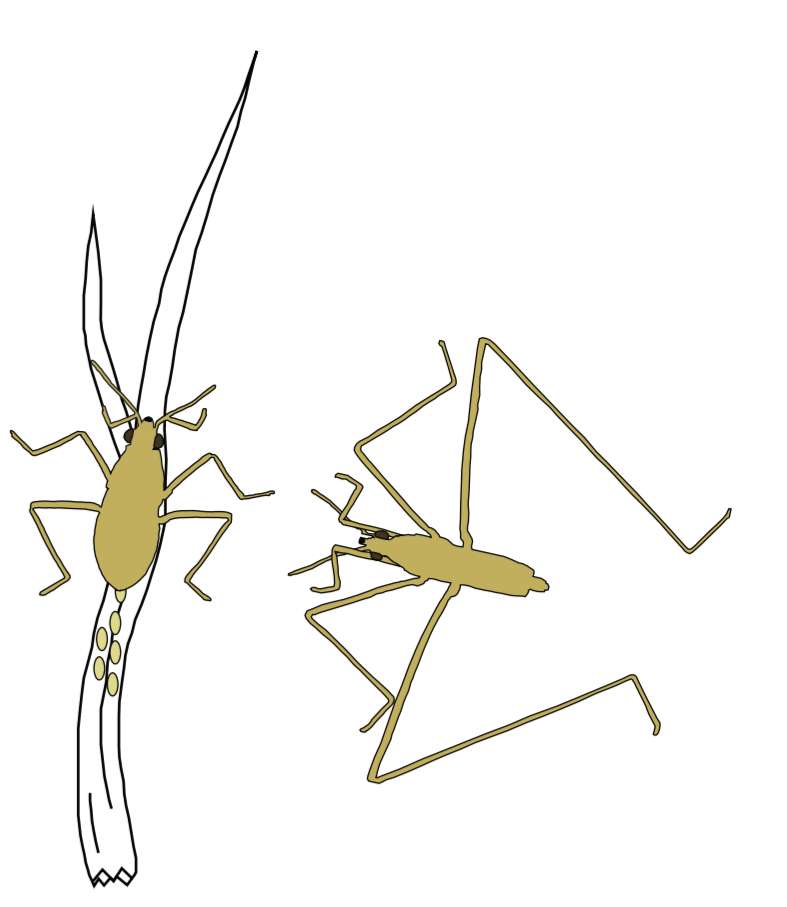

*Microvelia pulchella*

① Male calling

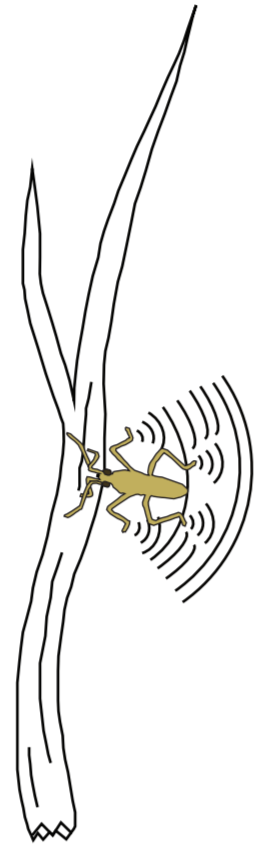

② Male fighting on floater

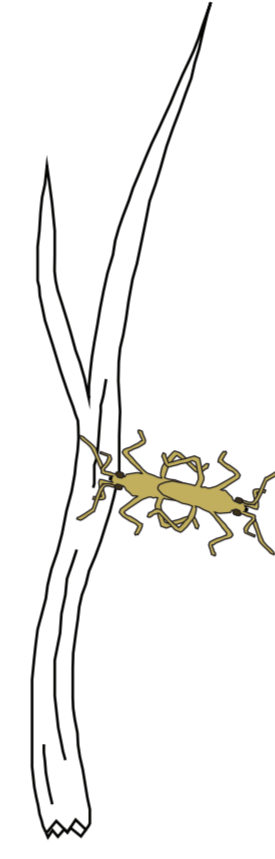

③ Mating on floater

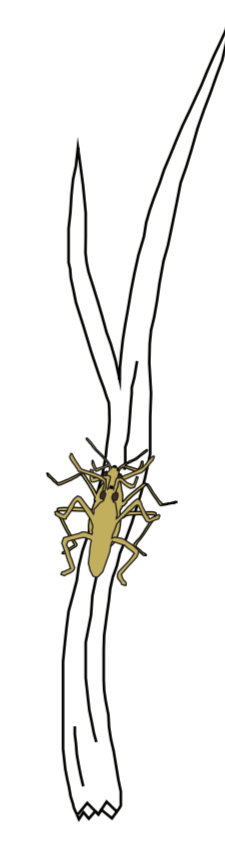

④ Male guarding

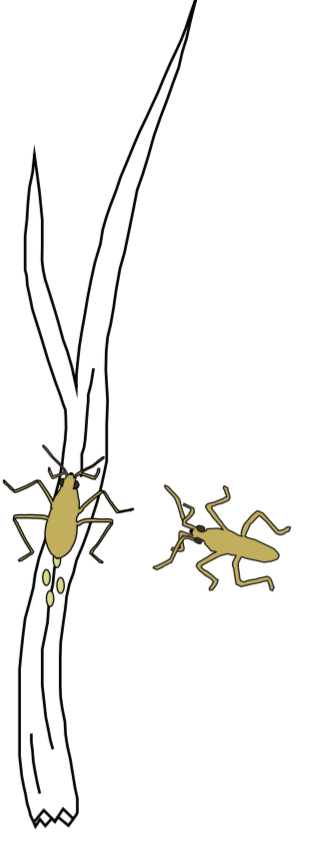

*Microvelia* sp.

① No male calling

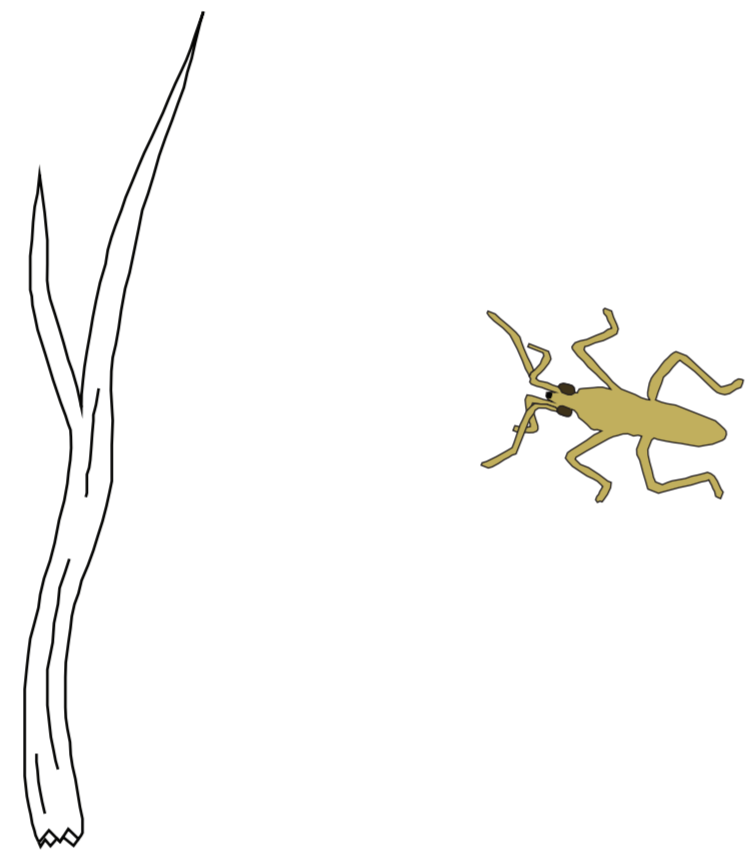

② Male fighting randomly

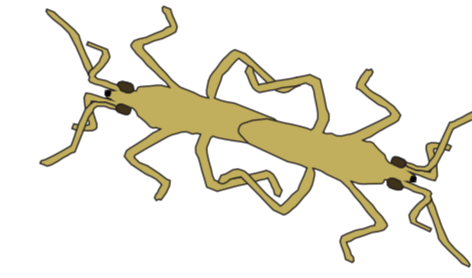

③ Mating randomly

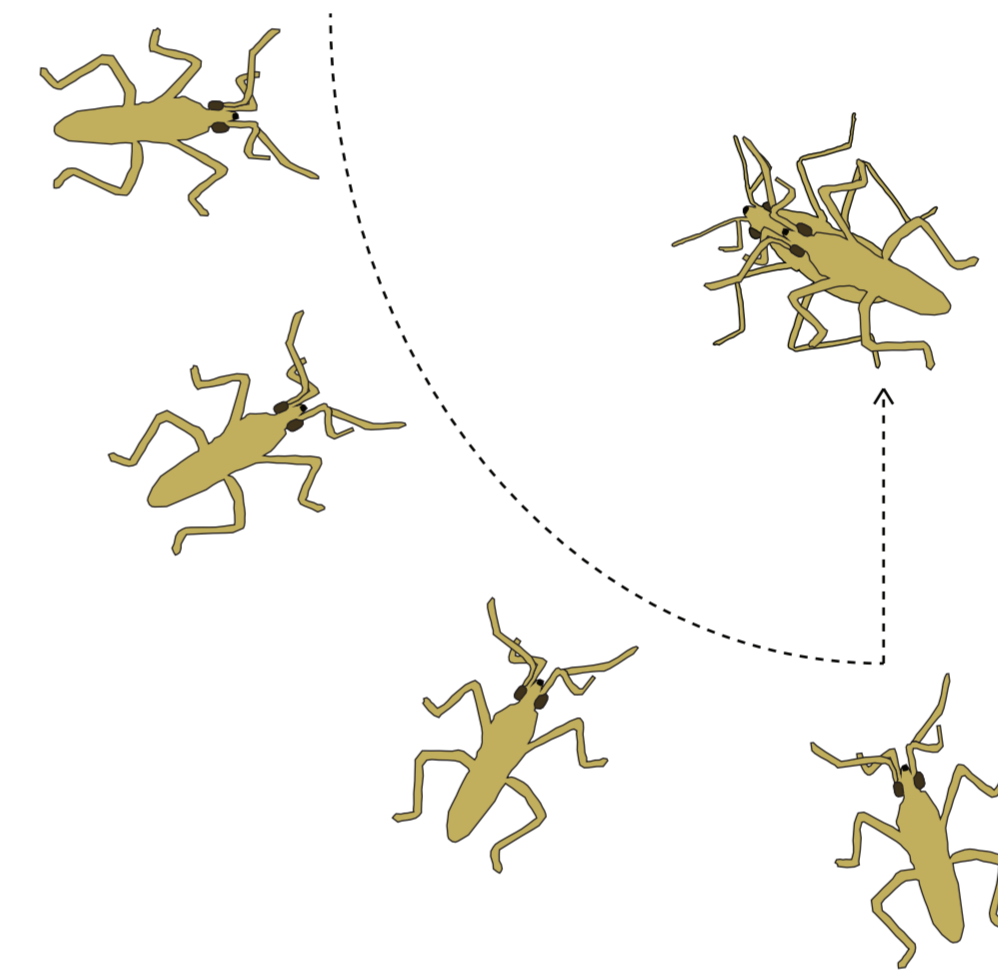

④ No male guarding

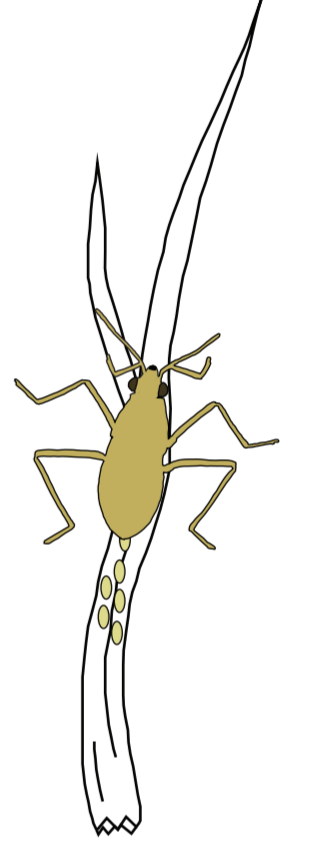

*Microvelia americana*

① No male calling

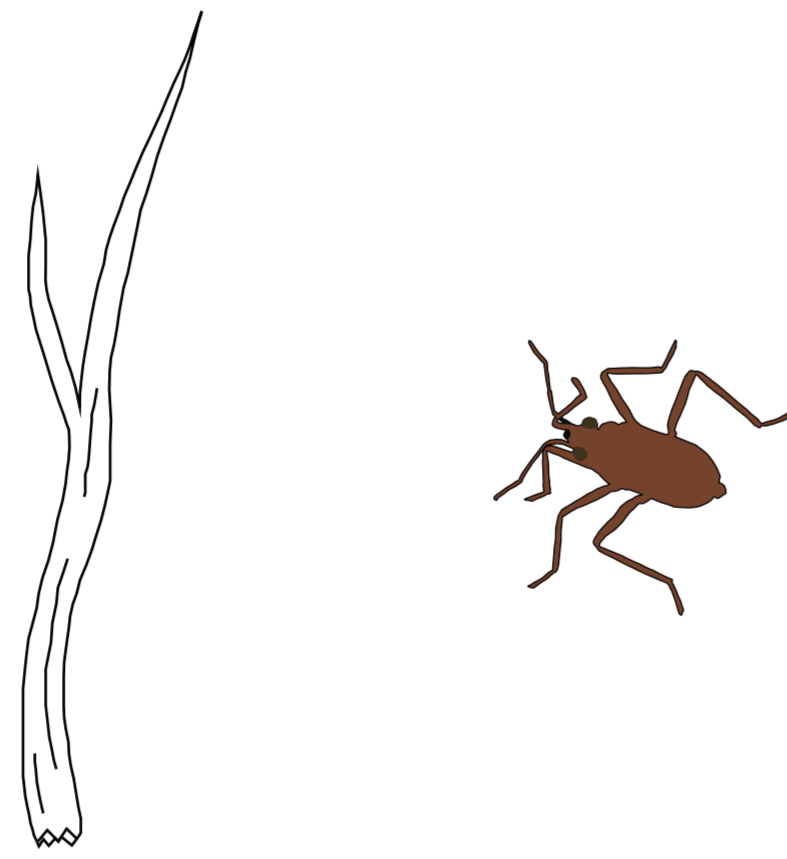

② Male fighting randomly

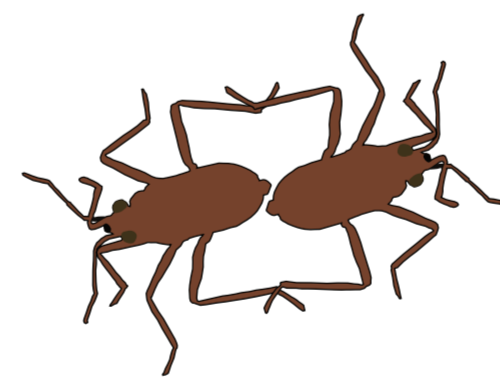

③ Mating randomly

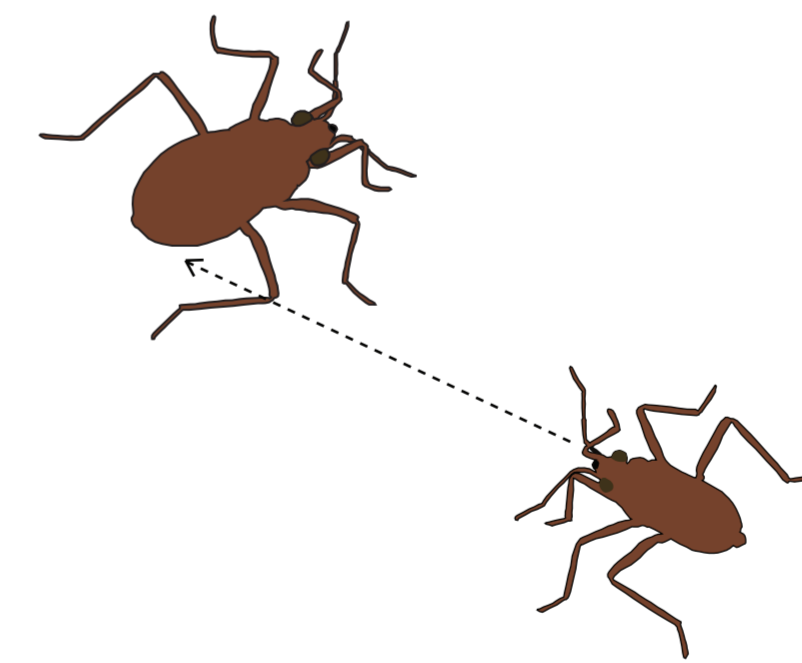

④ No male guarding

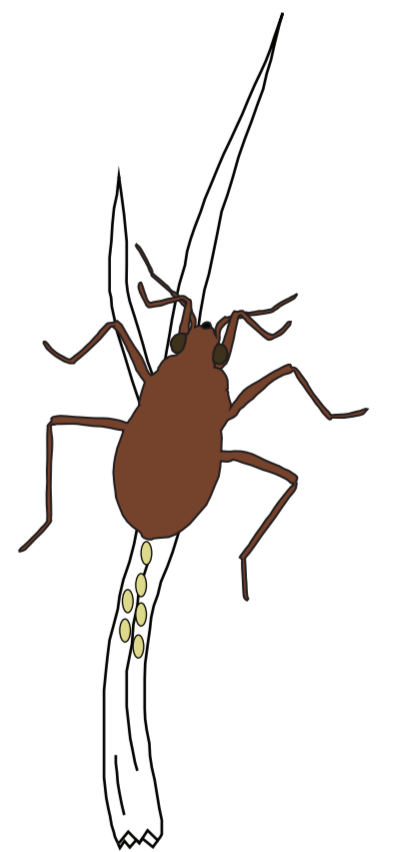

*Microvelia paludicola*

① No male calling

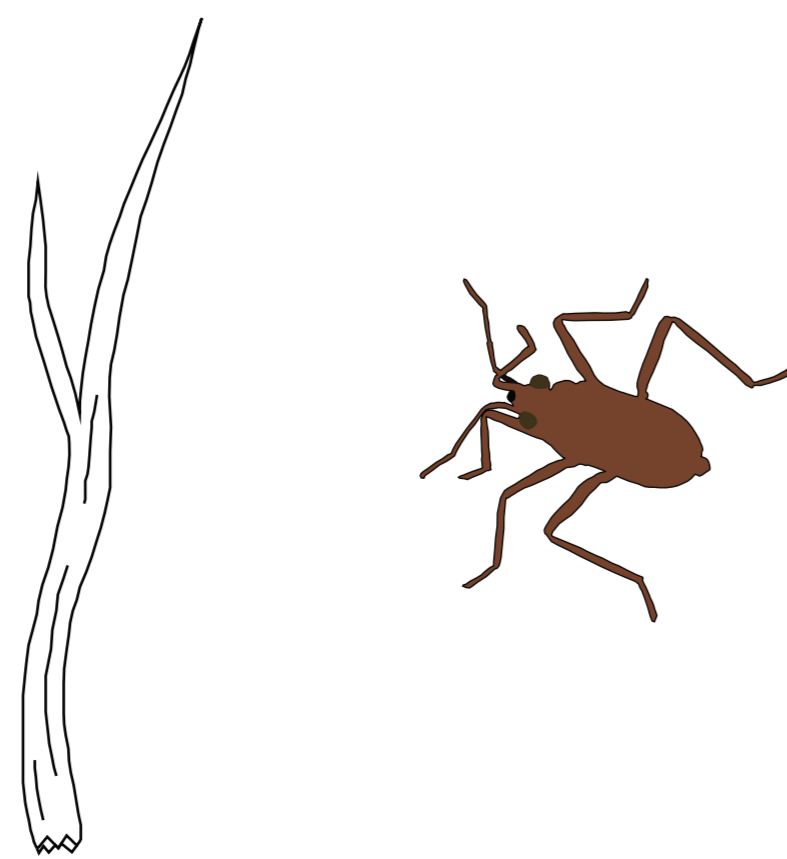

② Male fighting randomly

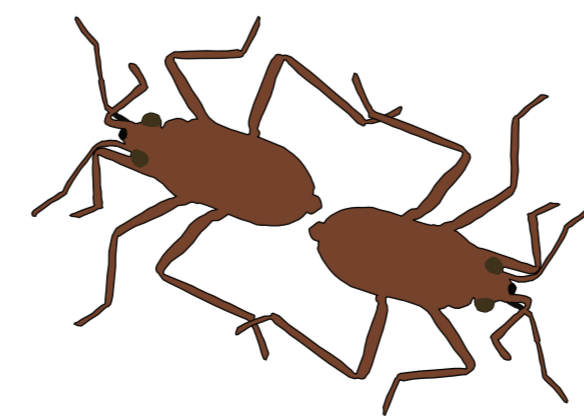

③ Mating randomly

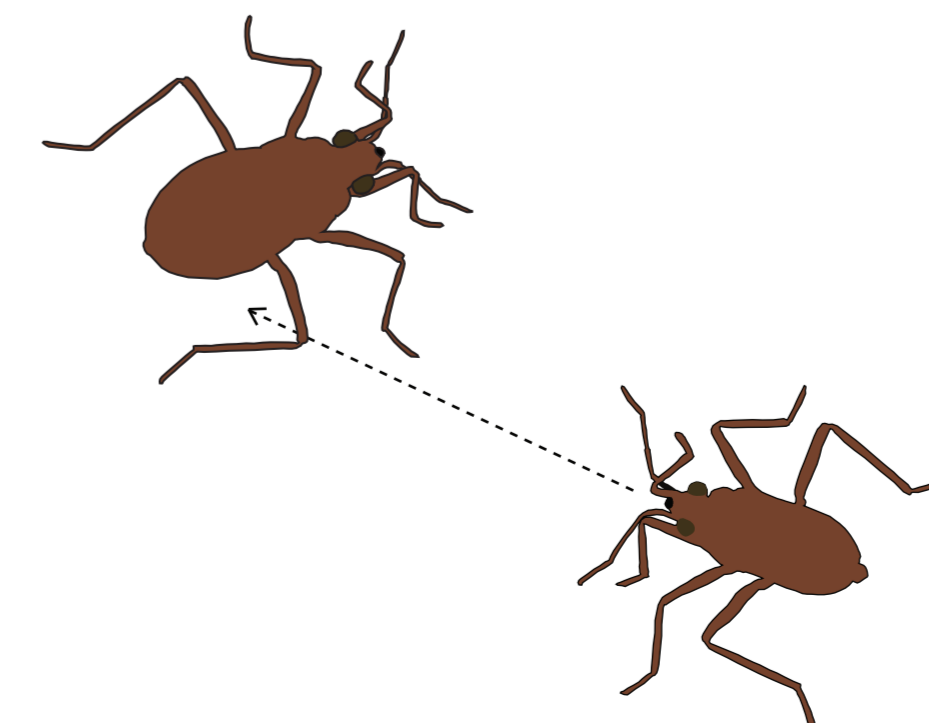

④ No male guarding

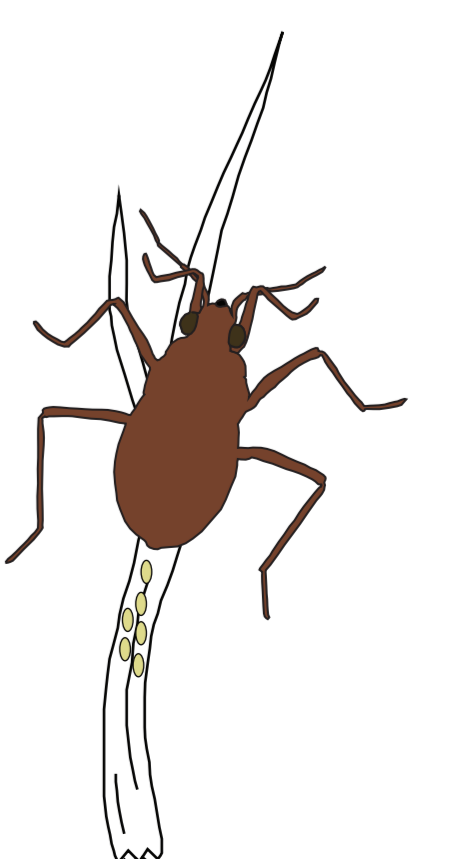

Supplement: Supplementary file [file 430314-2.pdf]
